## Expression of Concern

# Expression of Concern: Antioxidative and anti-photoaging activities of neferine upon UVA irradiation in human dermal fibroblasts

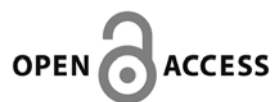

The Editorial Office has been made aware of potential issues surrounding the scientific validity of this paper, hence has issued an expression of concern to notify readers whilst the Editorial Office investigates.

Downloaded from [http://port.silverchair.com/bioscierep/article-pdf/41/2/BSR-20181414\\_EOC/904294/bsr-2018-1414-eoc.pdf](http://port.silverchair.com/bioscierep/article-pdf/41/2/BSR-20181414_EOC/904294/bsr-2018-1414-eoc.pdf) by guest on 25 April 2024

Version of Record published:  
17 February 2021
